# Supplementary material for: Comparing Sanger sequencing and high-throughput metabarcoding for inferring photobiont diversity in lichens
Source: Springer Nature journal article supplement (doi:10.1038/s41598-018-26947-8), 2018-05-30
Supplement: MOESM2 [file 41598_2018_26947_MOESM2_ESM.xlsx]

## Sheet: Sheet1
Supplementary Table S2. Comparison between OTUs detected via Sanger sequencing (full length ITS and ITS2) and Illumina ITS2 metabarcoding.
			Sanger				Illumina MiSeq									Illumina MiSeq
DNA number	Sample	Host	full ITS	full ITS GenBank accession	ITS2	ITS2 GenBank accession	OTU_1	OTU_2	OTU_3	OTU_4	OTU_5	OTU_6	OTU_15	OTU_16	total reads	OTU_1	OTU_2	OTU_3	OTU_4	OTU_5	OTU_6	OTU_15	OTU_16	frequency category
150300	1	Lasallia hispanica	OTU_5	MH299122	OTU_5	MH298924	3605	0	0	1412	112935	0	0	0	117952	3.1%	0.0%	0.0%	1.2%	95.7%	0.0%	0.0%	0.0%	2
150301	2	Lasallia hispanica	OTU_5	MH299123	OTU_5	MH298925	11356	0	0	1332	97310	0	0	0	109998	10.3%	0.0%	0.0%	1.2%	88.5%	0.0%	0.0%	0.0%	3
150302	3	Lasallia hispanica	OTU_5	MH299124	-		3084	0	0	1545	104027	0	0	0	108656	2.8%	0.0%	0.0%	1.4%	95.7%	0.0%	0.0%	0.0%	2
150303	4	Lasallia hispanica	OTU_4	MH299125	OTU_4	MH298926	4184	0	0	51276	3735	0	2208	2367	63770	6.6%	0.0%	0.0%	80.4%	5.9%	0.0%	3.5%	3.7%	2
150304	5	Lasallia hispanica	OTU_4	MH299126	OTU_4	MH298927	4032	0	0	77555	2021	0	0	0	83608	4.8%	0.0%	0.0%	92.8%	2.4%	0.0%	0.0%	0.0%	2
150305	6	Lasallia hispanica	OTU_6	MH299127	OTU_6	MH298928	4742	0	0	1490	2940	107693	0	0	116865	4.1%	0.0%	0.0%	1.3%	2.5%	92.2%	0.0%	0.0%	2
150306	7	Lasallia hispanica	OTU_1	MH299128	OTU_1	MH298929	76214	0	0	0	1238	0	0	0	77452	98.4%	0.0%	0.0%	0.0%	1.6%	0.0%	0.0%	0.0%	2
150307	8	Lasallia hispanica	OTU_1	MH299129	OTU_1	MH298930	73628	0	0	0	1508	0	0	0	75136	98.0%	0.0%	0.0%	0.0%	2.0%	0.0%	0.0%	0.0%	2
150308	9	Lasallia hispanica	OTU_4	MH299130	OTU_4	MH298931	5432	0	0	120732	4123	0	0	1200	131487	4.1%	0.0%	0.0%	91.8%	3.1%	0.0%	0.0%	0.9%	2
150309	10	Lasallia hispanica	-		OTU_5	MH298932	20626	0	0	1428	62076	0	0	0	84130	24.5%	0.0%	0.0%	1.7%	73.8%	0.0%	0.0%	0.0%	4
150310	11	Lasallia hispanica	OTU_1	MH299131	OTU_1	MH298933	93182	0	0	1451	1565	0	0	0	96198	96.9%	0.0%	0.0%	1.5%	1.6%	0.0%	0.0%	0.0%	2
150311	12	Lasallia hispanica	OTU_5	MH299132	OTU_5	MH298934	6005	0	0	0	82835	0	0	0	88840	6.8%	0.0%	0.0%	0.0%	93.2%	0.0%	0.0%	0.0%	2
150312	13	Lasallia hispanica	OTU_1	MH299133	OTU_1	MH298935	78173	0	0	0	1793	0	0	0	79966	97.8%	0.0%	0.0%	0.0%	2.2%	0.0%	0.0%	0.0%	2
150313	14	Lasallia hispanica	OTU_4	MH299134	OTU_4	MH298936	4215	0	0	71107	2541	0	1659	1789	81311	5.2%	0.0%	0.0%	87.5%	3.1%	0.0%	2.0%	2.2%	2
150314	15	Lasallia hispanica	OTU_1	MH299135	OTU_1	MH298937	135227	0	0	1218	1606	0	0	0	138051	98.0%	0.0%	0.0%	0.9%	1.2%	0.0%	0.0%	0.0%	2
150315	16	Lasallia hispanica	OTU_6	MH299136	OTU_6	MH298938	10077	0	0	3639	9371	64544	0	0	87631	11.5%	0.0%	0.0%	4.2%	10.7%	73.7%	0.0%	0.0%	3
150316	17	Lasallia hispanica	OTU_1	MH299137	OTU_1	MH298939	79530	0	0	0	0	0	0	0	79530	100.0%	0.0%	0.0%	0.0%	0.0%	0.0%	0.0%	0.0%	1
150317	18	Lasallia hispanica	OTU_4	MH299138	OTU_4	MH298940	6051	0	0	59205	7396	0	5429	6005	84086	7.2%	0.0%	0.0%	70.4%	8.8%	0.0%	6.5%	7.1%	2
150318	19	Lasallia hispanica	OTU_5	MH299139	OTU_5	MH298941	7892	0	0	0	63001	0	0	0	70893	11.1%	0.0%	0.0%	0.0%	88.9%	0.0%	0.0%	0.0%	3
150319	20	Lasallia hispanica	OTU_1	MH299140	OTU_1	MH298942	76428	0	0	0	0	0	0	0	76428	100.0%	0.0%	0.0%	0.0%	0.0%	0.0%	0.0%	0.0%	1
150320	21	Lasallia hispanica	OTU_1	MH299141	OTU_1	MH298943	72053	0	0	0	0	0	0	0	72053	100.0%	0.0%	0.0%	0.0%	0.0%	0.0%	0.0%	0.0%	1
150321	22	Lasallia hispanica	OTU_1	MH299142	OTU_1	MH298944	76318	0	0	0	0	0	0	0	76318	100.0%	0.0%	0.0%	0.0%	0.0%	0.0%	0.0%	0.0%	1
150322	23	Lasallia hispanica	OTU_1	MH299143	OTU_1	MH298945	37703	0	0	0	0	0	0	0	37703	100.0%	0.0%	0.0%	0.0%	0.0%	0.0%	0.0%	0.0%	1
150323	24	Lasallia hispanica	OTU_1	MH299144	OTU_1	MH298946	38880	0	0	0	0	0	0	0	38880	100.0%	0.0%	0.0%	0.0%	0.0%	0.0%	0.0%	0.0%	1
150324	25	Lasallia hispanica	OTU_1	MH299145	OTU_1	MH298947	73064	0	0	0	0	0	0	0	73064	100.0%	0.0%	0.0%	0.0%	0.0%	0.0%	0.0%	0.0%	1
150325	26	Lasallia hispanica	OTU_1	MH299146	OTU_1	MH298948	80776	0	0	0	0	0	0	0	80776	100.0%	0.0%	0.0%	0.0%	0.0%	0.0%	0.0%	0.0%	1
150326	27	Lasallia hispanica	OTU_1	MH299147	OTU_1	MH298949	88121	0	0	0	0	0	0	0	88121	100.0%	0.0%	0.0%	0.0%	0.0%	0.0%	0.0%	0.0%	1
150327	28	Lasallia hispanica	OTU_1	MH299148	OTU_1	MH298950	70317	0	0	0	0	0	0	0	70317	100.0%	0.0%	0.0%	0.0%	0.0%	0.0%	0.0%	0.0%	1
150328	29	Lasallia hispanica	OTU_1	MH299149	OTU_1	MH298951	119213	0	0	0	0	0	0	0	119213	100.0%	0.0%	0.0%	0.0%	0.0%	0.0%	0.0%	0.0%	1
150329	30	Lasallia hispanica	OTU_1	MH299150	OTU_1	MH298952	63519	0	0	0	0	0	0	0	63519	100.0%	0.0%	0.0%	0.0%	0.0%	0.0%	0.0%	0.0%	1
150330	31	Lasallia hispanica	OTU_1	MH299151	OTU_1	MH298953	60806	0	0	0	0	0	0	0	60806	100.0%	0.0%	0.0%	0.0%	0.0%	0.0%	0.0%	0.0%	1
150331	32	Lasallia hispanica	OTU_1	MH299152	-		52142	0	0	0	0	0	0	0	52142	100.0%	0.0%	0.0%	0.0%	0.0%	0.0%	0.0%	0.0%	1
150332	33	Lasallia hispanica	OTU_4	MH299153	-		8140	0	0	96930	8809	0	7973	8318	130170	6.3%	0.0%	0.0%	74.5%	6.8%	0.0%	6.1%	6.4%	2
150333	34	Lasallia hispanica	OTU_1	MH299154	OTU_1	MH298954	135154	0	0	0	0	0	0	0	135154	100.0%	0.0%	0.0%	0.0%	0.0%	0.0%	0.0%	0.0%	1
150334	35	Lasallia hispanica	OTU_1	MH299155	OTU_1	MH298955	93858	0	0	0	0	0	0	0	93858	100.0%	0.0%	0.0%	0.0%	0.0%	0.0%	0.0%	0.0%	1
150335	36	Lasallia hispanica	OTU_1	MH299156	OTU_1	MH298956	133737	0	0	0	0	0	0	0	133737	100.0%	0.0%	0.0%	0.0%	0.0%	0.0%	0.0%	0.0%	1
150336	37	Lasallia hispanica	OTU_1	MH299157	OTU_1	MH298957	138617	0	0	0	0	0	0	0	138617	100.0%	0.0%	0.0%	0.0%	0.0%	0.0%	0.0%	0.0%	1
150337	38	Lasallia hispanica	OTU_1	MH299158	OTU_1	MH298958	138320	0	0	0	0	0	0	0	138320	100.0%	0.0%	0.0%	0.0%	0.0%	0.0%	0.0%	0.0%	1
150338	39	Lasallia hispanica	OTU_1	MH299159	-		67534	0	0	0	0	0	0	0	67534	100.0%	0.0%	0.0%	0.0%	0.0%	0.0%	0.0%	0.0%	1
150339	40	Lasallia hispanica	OTU_1	MH299160	-		91758	0	0	0	0	0	0	0	91758	100.0%	0.0%	0.0%	0.0%	0.0%	0.0%	0.0%	0.0%	1
150340	41	Lasallia hispanica	OTU_1	MH299161	OTU_1	MH298959	141760	0	0	0	0	0	0	0	141760	100.0%	0.0%	0.0%	0.0%	0.0%	0.0%	0.0%	0.0%	1
150341	42	Lasallia hispanica	OTU_1	MH299162	OTU_1	MH298960	128528	0	0	0	0	0	0	0	128528	100.0%	0.0%	0.0%	0.0%	0.0%	0.0%	0.0%	0.0%	1
150342	43	Lasallia hispanica	OTU_1	MH299163	OTU_1	MH298961	112920	0	0	0	0	0	0	0	112920	100.0%	0.0%	0.0%	0.0%	0.0%	0.0%	0.0%	0.0%	1
150343	44	Lasallia hispanica	OTU_1	MH299164	OTU_1	MH298962	84632	0	0	0	0	0	0	0	84632	100.0%	0.0%	0.0%	0.0%	0.0%	0.0%	0.0%	0.0%	1
150344	45	Lasallia hispanica	OTU_1	MH299165	OTU_1	MH298963	111561	0	0	0	0	0	0	0	111561	100.0%	0.0%	0.0%	0.0%	0.0%	0.0%	0.0%	0.0%	1
150345	46	Lasallia hispanica	OTU_1	MH299166	OTU_1	MH298964	112312	0	0	0	0	0	0	0	112312	100.0%	0.0%	0.0%	0.0%	0.0%	0.0%	0.0%	0.0%	1
150346	47	Lasallia hispanica	OTU_1	MH299167	OTU_1	MH298965	93942	0	0	0	0	0	0	0	93942	100.0%	0.0%	0.0%	0.0%	0.0%	0.0%	0.0%	0.0%	1
150347	48	Lasallia hispanica	OTU_1	MH299168	OTU_1	MH298966	96511	0	0	0	0	0	0	0	96511	100.0%	0.0%	0.0%	0.0%	0.0%	0.0%	0.0%	0.0%	1
150348	49	Lasallia hispanica	OTU_1	MH299169	OTU_1	MH298967	101904	0	0	0	0	0	0	0	101904	100.0%	0.0%	0.0%	0.0%	0.0%	0.0%	0.0%	0.0%	1
150349	50	Lasallia hispanica	OTU_1	MH299170	-		101459	0	0	0	0	0	0	0	101459	100.0%	0.0%	0.0%	0.0%	0.0%	0.0%	0.0%	0.0%	1
150350	51	Lasallia hispanica	OTU_1	MH299171	-		104699	0	0	0	0	0	0	0	104699	100.0%	0.0%	0.0%	0.0%	0.0%	0.0%	0.0%	0.0%	1
150351	52	Lasallia hispanica	OTU_1	MH299172	OTU_1	MH298968	79740	0	0	0	0	0	0	0	79740	100.0%	0.0%	0.0%	0.0%	0.0%	0.0%	0.0%	0.0%	1
150352	53	Lasallia hispanica	OTU_1	MH299173	OTU_1	MH298969	90382	0	0	0	0	0	0	0	90382	100.0%	0.0%	0.0%	0.0%	0.0%	0.0%	0.0%	0.0%	1
150353	54	Lasallia hispanica	OTU_1	MH299174	OTU_1	MH298970	106435	0	0	0	0	0	0	0	106435	100.0%	0.0%	0.0%	0.0%	0.0%	0.0%	0.0%	0.0%	1
150354	55	Lasallia hispanica	OTU_1	MH299175	OTU_1	MH298971	82651	0	0	0	0	0	0	0	82651	100.0%	0.0%	0.0%	0.0%	0.0%	0.0%	0.0%	0.0%	1
150355	56	Lasallia hispanica	OTU_1	MH299176	-		73132	0	0	0	0	0	0	0	73132	100.0%	0.0%	0.0%	0.0%	0.0%	0.0%	0.0%	0.0%	1
150356	57	Lasallia hispanica	OTU_1	MH299177	OTU_1	MH298972	101469	0	0	0	0	0	0	0	101469	100.0%	0.0%	0.0%	0.0%	0.0%	0.0%	0.0%	0.0%	1
150357	58	Lasallia hispanica	OTU_1	MH299178	OTU_1	MH298973	153665	0	0	0	0	0	0	0	153665	100.0%	0.0%	0.0%	0.0%	0.0%	0.0%	0.0%	0.0%	1
150358	59	Lasallia hispanica	OTU_4	MH299179	OTU_4	MH298974	7606	0	0	80991	0	0	1461	1546	91604	8.3%	0.0%	0.0%	88.4%	0.0%	0.0%	1.6%	1.7%	2
150359	60	Lasallia hispanica	OTU_1	MH299180	OTU_1	MH298975	90349	0	0	0	0	0	0	0	90349	100.0%	0.0%	0.0%	0.0%	0.0%	0.0%	0.0%	0.0%	1
150360	61	Lasallia hispanica	OTU_1	MH299181	OTU_1	MH298976	90104	0	0	0	0	0	0	0	90104	100.0%	0.0%	0.0%	0.0%	0.0%	0.0%	0.0%	0.0%	1
150361	62	Lasallia hispanica	OTU_1	MH299182	OTU_1	MH298977	115157	0	0	0	0	0	0	0	115157	100.0%	0.0%	0.0%	0.0%	0.0%	0.0%	0.0%	0.0%	1
150362	63	Lasallia hispanica	OTU_1	MH299183	OTU_1	MH298978	77968	0	0	0	0	0	0	0	77968	100.0%	0.0%	0.0%	0.0%	0.0%	0.0%	0.0%	0.0%	1
150363	64	Lasallia hispanica	OTU_1	MH299184	OTU_1	MH298979	78275	0	0	0	0	0	0	0	78275	100.0%	0.0%	0.0%	0.0%	0.0%	0.0%	0.0%	0.0%	1
150364	65	Lasallia hispanica	OTU_1	MH299185	OTU_1	MH298980	88336	0	0	0	0	0	0	0	88336	100.0%	0.0%	0.0%	0.0%	0.0%	0.0%	0.0%	0.0%	1
150365	66	Lasallia hispanica	OTU_1	MH299186	OTU_1	MH298981	72663	9670	0	0	0	0	0	0	82333	88.3%	11.7%	0.0%	0.0%	0.0%	0.0%	0.0%	0.0%	3
150366	67	Lasallia hispanica	OTU_1	MH299187	OTU_1	MH298982	81858	0	0	0	0	0	0	0	81858	100.0%	0.0%	0.0%	0.0%	0.0%	0.0%	0.0%	0.0%	1
150367	68	Lasallia hispanica	OTU_1	MH299188	OTU_1	MH298983	94925	0	0	0	0	0	0	0	94925	100.0%	0.0%	0.0%	0.0%	0.0%	0.0%	0.0%	0.0%	1
150368	69	Lasallia hispanica	OTU_1	MH299189	OTU_1	MH298984	84735	0	0	0	0	0	0	0	84735	100.0%	0.0%	0.0%	0.0%	0.0%	0.0%	0.0%	0.0%	1
150369	70	Lasallia hispanica	OTU_1	MH299190	OTU_1	MH298985	91109	0	0	0	0	0	0	0	91109	100.0%	0.0%	0.0%	0.0%	0.0%	0.0%	0.0%	0.0%	1
150370	71	Lasallia hispanica	OTU_1	MH299191	OTU_1	MH298986	57900	0	0	0	0	0	0	0	57900	100.0%	0.0%	0.0%	0.0%	0.0%	0.0%	0.0%	0.0%	1
150371	72	Lasallia hispanica	OTU_1	MH299192	-		74824	0	0	0	0	0	0	0	74824	100.0%	0.0%	0.0%	0.0%	0.0%	0.0%	0.0%	0.0%	1
150372	73	Lasallia hispanica	OTU_1	MH299193	OTU_1	MH298987	95396	0	0	0	0	0	0	0	95396	100.0%	0.0%	0.0%	0.0%	0.0%	0.0%	0.0%	0.0%	1
150373	74	Lasallia hispanica	OTU_1	MH299194	OTU_1	MH298988	185514	0	0	0	0	0	0	0	185514	100.0%	0.0%	0.0%	0.0%	0.0%	0.0%	0.0%	0.0%	1
150374	75	Lasallia hispanica	OTU_1	MH299195	OTU_1	MH298989	127825	0	0	0	0	0	0	0	127825	100.0%	0.0%	0.0%	0.0%	0.0%	0.0%	0.0%	0.0%	1
150375	76	Lasallia hispanica	OTU_1	MH299196	OTU_1	MH298990	86262	0	0	0	0	0	0	0	86262	100.0%	0.0%	0.0%	0.0%	0.0%	0.0%	0.0%	0.0%	1
150376	77	Lasallia hispanica	OTU_1	MH299197	OTU_1	MH298991	70036	0	0	0	0	0	0	0	70036	100.0%	0.0%	0.0%	0.0%	0.0%	0.0%	0.0%	0.0%	1
150377	78	Lasallia hispanica	OTU_1	MH299198	OTU_1	MH298992	93562	0	0	0	0	0	0	0	93562	100.0%	0.0%	0.0%	0.0%	0.0%	0.0%	0.0%	0.0%	1
150378	79	Lasallia hispanica	OTU_1	MH299199	OTU_1	MH298993	83381	0	0	0	0	0	0	0	83381	100.0%	0.0%	0.0%	0.0%	0.0%	0.0%	0.0%	0.0%	1
150379	80	Lasallia hispanica	OTU_1	MH299200	OTU_1	MH298994	80084	0	0	0	0	0	0	0	80084	100.0%	0.0%	0.0%	0.0%	0.0%	0.0%	0.0%	0.0%	1
150380	81	Lasallia hispanica	-		OTU_4	MH298995	3348	1318	0	72931	7119	0	4858	5629	95203	3.5%	1.4%	0.0%	76.6%	7.5%	0.0%	5.1%	5.9%	2
150381	82	Lasallia hispanica	OTU_1	MH299201	OTU_1	MH298996	76194	12505	0	2573	0	0	0	0	91272	83.5%	13.7%	0.0%	2.8%	0.0%	0.0%	0.0%	0.0%	3
150382	83	Lasallia hispanica	OTU_4	MH299202	OTU_4	MH298997	2568	1292	0	82543	5362	0	3881	4458	100104	2.6%	1.3%	0.0%	82.5%	5.4%	0.0%	3.9%	4.5%	2
150383	84	Lasallia hispanica	-		-		3342	1510	0	34579	41495	0	8682	9804	99412	3.4%	1.5%	0.0%	34.8%	41.7%	0.0%	8.7%	9.9%	5
150384	85	Lasallia hispanica	OTU_1	MH299203	OTU_1	MH298998	98912	1548	0	1909	0	0	0	0	102369	96.6%	1.5%	0.0%	1.9%	0.0%	0.0%	0.0%	0.0%	2
150385	86	Lasallia hispanica	OTU_4	MH299204	OTU_4	MH298999	3356	0	0	86339	10891	0	8140	8906	117632	2.9%	0.0%	0.0%	73.4%	9.3%	0.0%	6.9%	7.6%	2
150386	87	Lasallia hispanica	OTU_2	MH299205	OTU_2	MH299000	19455	83236	0	1467	0	0	0	0	104158	18.7%	79.9%	0.0%	1.4%	0.0%	0.0%	0.0%	0.0%	3
150387	88	Lasallia hispanica	OTU_2	MH299206	OTU_2	MH299001	16776	78477	0	1652	0	0	0	0	96905	17.3%	81.0%	0.0%	1.7%	0.0%	0.0%	0.0%	0.0%	3
150388	89	Lasallia hispanica	OTU_1	MH299207	OTU_1	MH299002	93518	11054	0	2398	0	0	0	0	106970	87.4%	10.3%	0.0%	2.2%	0.0%	0.0%	0.0%	0.0%	3
150389	90	Lasallia hispanica	OTU_4	MH299208	OTU_4	MH299003	5387	1617	0	145005	0	0	0	0	152009	3.5%	1.1%	0.0%	95.4%	0.0%	0.0%	0.0%	0.0%	2
150390	91	Lasallia hispanica	-		-		2853	1637	0	28324	0	44107	0	0	76921	3.7%	2.1%	0.0%	36.8%	0.0%	57.3%	0.0%	0.0%	5
150391	92	Lasallia hispanica	-		OTU_5	MH299004	23498	3273	0	4077	78204	1935	0	0	110987	21.2%	2.9%	0.0%	3.7%	70.5%	1.7%	0.0%	0.0%	4
150392	93	Lasallia hispanica	OTU_5	MH299209	OTU_5	MH299005	3611	0	0	1933	89701	0	0	0	95245	3.8%	0.0%	0.0%	2.0%	94.2%	0.0%	0.0%	0.0%	2
150393	94	Lasallia hispanica	OTU_6	MH299210	OTU_6	MH299006	3080	1575	0	2409	0	98578	0	0	105642	2.9%	1.5%	0.0%	2.3%	0.0%	93.3%	0.0%	0.0%	2
150394	95	Lasallia hispanica	OTU_4	MH299211	OTU_4	MH299007	3112	0	0	67722	5092	0	4506	5127	85559	3.6%	0.0%	0.0%	79.2%	6.0%	0.0%	5.3%	6.0%	2
150395	96	Lasallia hispanica	OTU_4	MH299212	OTU_4	MH299008	2399	1305	0	72703	0	0	0	0	76407	3.1%	1.7%	0.0%	95.2%	0.0%	0.0%	0.0%	0.0%	2
150396	97	Lasallia hispanica	OTU_1	MH299213	OTU_1	MH299009	90884	3014	0	0	0	0	0	0	93898	96.8%	3.2%	0.0%	0.0%	0.0%	0.0%	0.0%	0.0%	2
150397	98	Lasallia hispanica	-		OTU_2	MH299010	19559	67815	0	1298	0	0	0	0	88672	22.1%	76.5%	0.0%	1.5%	0.0%	0.0%	0.0%	0.0%	4
150398	99	Lasallia hispanica	OTU_4	MH299214	OTU_4	MH299011	3262	2922	0	118465	0	0	0	0	124649	2.6%	2.3%	0.0%	95.0%	0.0%	0.0%	0.0%	0.0%	2
150399	100	Lasallia hispanica	OTU_4	MH299215	OTU_4	MH299012	4202	2818	0	62306	4737	0	4214	4213	82490	5.1%	3.4%	0.0%	75.5%	5.7%	0.0%	5.1%	5.1%	2
150400	101	Lasallia hispanica	-		-		37296	76769	0	0	0	0	0	0	114065	32.7%	67.3%	0.0%	0.0%	0.0%	0.0%	0.0%	0.0%	5
150401	102	Lasallia hispanica	OTU_1	MH299216	OTU_1	MH299013	98234	12641	0	0	0	0	0	0	110875	88.6%	11.4%	0.0%	0.0%	0.0%	0.0%	0.0%	0.0%	3
150402	103	Lasallia hispanica	-		OTU_2	MH299014	15012	56733	0	0	0	0	0	0	71745	20.9%	79.1%	0.0%	0.0%	0.0%	0.0%	0.0%	0.0%	4
150403	104	Lasallia hispanica	-		-		2838	2929	0	25063	37449	0	6067	5628	79974	3.5%	3.7%	0.0%	31.3%	46.8%	0.0%	7.6%	7.0%	5
150404	105	Lasallia hispanica	-		-		29945	81467	0	0	0	0	0	0	111412	26.9%	73.1%	0.0%	0.0%	0.0%	0.0%	0.0%	0.0%	4
150405	106	Lasallia hispanica	-		OTU_2	MH299015	19037	80363	0	0	0	0	0	0	99400	19.2%	80.8%	0.0%	0.0%	0.0%	0.0%	0.0%	0.0%	3
150406	107	Lasallia hispanica	OTU_6	MH299217	OTU_6	MH299016	3779	3444	0	0	0	93916	0	0	101139	3.7%	3.4%	0.0%	0.0%	0.0%	92.9%	0.0%	0.0%	2
150407	108	Lasallia hispanica	-		-		19781	56235	0	0	0	0	0	0	76016	26.0%	74.0%	0.0%	0.0%	0.0%	0.0%	0.0%	0.0%	4
150408	109	Lasallia hispanica	-		-		25481	45440	0	0	0	0	0	0	70921	35.9%	64.1%	0.0%	0.0%	0.0%	0.0%	0.0%	0.0%	5
150409	110	Lasallia hispanica	-		OTU_2	MH299017	15686	72261	0	0	0	0	0	0	87947	17.8%	82.2%	0.0%	0.0%	0.0%	0.0%	0.0%	0.0%	3
150410	111	Lasallia hispanica	OTU_1	MH299218	OTU_1	MH299018	50092	10589	0	0	0	0	0	0	60681	82.5%	17.5%	0.0%	0.0%	0.0%	0.0%	0.0%	0.0%	3
150411	112	Lasallia hispanica	-		-		27184	62706	0	0	0	0	0	0	89890	30.2%	69.8%	0.0%	0.0%	0.0%	0.0%	0.0%	0.0%	5
150412	113	Lasallia hispanica	OTU_2	MH299219	OTU_2	MH299019	23657	73437	0	0	0	0	0	0	97094	24.4%	75.6%	0.0%	0.0%	0.0%	0.0%	0.0%	0.0%	4
150413	114	Lasallia hispanica	OTU_1	MH299220	OTU_1	MH299020	152419	22093	0	0	0	0	0	0	174512	87.3%	12.7%	0.0%	0.0%	0.0%	0.0%	0.0%	0.0%	3
150414	115	Lasallia hispanica	-		OTU_6	MH299021	6832	2559	0	0	0	92531	0	0	101922	6.7%	2.5%	0.0%	0.0%	0.0%	90.8%	0.0%	0.0%	2
150415	116	Lasallia hispanica	-		OTU_2	MH299022	38444	92572	0	0	0	0	0	0	131016	29.3%	70.7%	0.0%	0.0%	0.0%	0.0%	0.0%	0.0%	4
150416	117	Lasallia hispanica	-		-		27285	58536	0	0	0	0	0	0	85821	31.8%	68.2%	0.0%	0.0%	0.0%	0.0%	0.0%	0.0%	5
150417	118	Lasallia hispanica	OTU_6	MH299221	OTU_6	MH299023	9136	2229	0	0	0	153561	0	0	164926	5.5%	1.4%	0.0%	0.0%	0.0%	93.1%	0.0%	0.0%	2
150418	119	Lasallia hispanica	OTU_2	MH299222	OTU_2	MH299024	26775	102501	0	0	0	0	0	0	129276	20.7%	79.3%	0.0%	0.0%	0.0%	0.0%	0.0%	0.0%	4
150419	120	Lasallia hispanica	OTU_2	MH299223	OTU_2	MH299025	25396	109299	0	0	0	0	0	0	134695	18.9%	81.1%	0.0%	0.0%	0.0%	0.0%	0.0%	0.0%	3
150420	121	Lasallia pustulata	OTU_1	MH299224	OTU_1	MH299026	135957	4656	0	0	0	1328	0	0	141941	95.8%	3.3%	0.0%	0.0%	0.0%	0.9%	0.0%	0.0%	2
150421	122	Lasallia pustulata	OTU_1	MH299225	OTU_1	MH299027	154745	3346	0	0	0	2275	0	0	160366	96.5%	2.1%	0.0%	0.0%	0.0%	1.4%	0.0%	0.0%	2
150422	123	Lasallia pustulata	OTU_1	MH299226	OTU_1	MH299028	103523	16275	0	0	0	0	0	0	119798	86.4%	13.6%	0.0%	0.0%	0.0%	0.0%	0.0%	0.0%	3
150423	124	Lasallia pustulata	OTU_1	MH299227	OTU_1	MH299029	131591	3195	0	0	0	0	0	0	134786	97.6%	2.4%	0.0%	0.0%	0.0%	0.0%	0.0%	0.0%	2
150424	125	Lasallia pustulata	OTU_1	MH299228	OTU_1	MH299030	194810	2116	0	0	0	0	0	0	196926	98.9%	1.1%	0.0%	0.0%	0.0%	0.0%	0.0%	0.0%	2
150425	126	Lasallia pustulata	OTU_1	MH299229	OTU_1	MH299031	198296	2959	0	0	0	0	0	0	201255	98.5%	1.5%	0.0%	0.0%	0.0%	0.0%	0.0%	0.0%	2
150426	127	Lasallia pustulata	OTU_1	MH299230	OTU_1	MH299032	148744	1949	0	0	0	0	0	0	150693	98.7%	1.3%	0.0%	0.0%	0.0%	0.0%	0.0%	0.0%	2
150427	128	Lasallia pustulata	OTU_1	MH299231	OTU_1	MH299033	78576	2510	0	0	0	0	0	0	81086	96.9%	3.1%	0.0%	0.0%	0.0%	0.0%	0.0%	0.0%	2
150428	129	Lasallia pustulata	OTU_1	MH299232	OTU_1	MH299034	67704	1324	0	0	0	0	0	0	69028	98.1%	1.9%	0.0%	0.0%	0.0%	0.0%	0.0%	0.0%	2
150429	130	Lasallia pustulata	-		OTU_1	MH299035	106217	1349	0	0	0	0	0	0	107566	98.7%	1.3%	0.0%	0.0%	0.0%	0.0%	0.0%	0.0%	2
150430	131	Lasallia pustulata	-		-		42871	4646	0	0	0	0	0	0	47517	90.2%	9.8%	0.0%	0.0%	0.0%	0.0%	0.0%	0.0%	2
150431	132	Lasallia pustulata	OTU_1	MH299233	OTU_1	MH299036	236128	1279	0	0	0	0	0	0	237407	99.5%	0.5%	0.0%	0.0%	0.0%	0.0%	0.0%	0.0%	2
150432	133	Lasallia pustulata	OTU_1	MH299234	OTU_1	MH299037	77614	1387	0	0	0	0	0	0	79001	98.2%	1.8%	0.0%	0.0%	0.0%	0.0%	0.0%	0.0%	2
150433	134	Lasallia pustulata	OTU_1	MH299235	OTU_1	MH299038	6957	0	0	0	0	0	0	0	6957	100.0%	0.0%	0.0%	0.0%	0.0%	0.0%	0.0%	0.0%	1
150434	135	Lasallia pustulata	-		-		20610	43244	0	0	0	0	0	0	63854	32.3%	67.7%	0.0%	0.0%	0.0%	0.0%	0.0%	0.0%	5
150435	136	Lasallia pustulata	OTU_1	MH299236	OTU_1	MH299039	49869	8008	0	0	0	0	0	0	57877	86.2%	13.8%	0.0%	0.0%	0.0%	0.0%	0.0%	0.0%	3
150436	137	Lasallia pustulata	-		OTU_2	MH299040	21511	76387	0	0	0	0	0	0	97898	22.0%	78.0%	0.0%	0.0%	0.0%	0.0%	0.0%	0.0%	4
150437	138	Lasallia pustulata	OTU_1	MH299237	OTU_1	MH299041	113811	1867	0	0	0	0	0	0	115678	98.4%	1.6%	0.0%	0.0%	0.0%	0.0%	0.0%	0.0%	2
150438	139	Lasallia pustulata	OTU_1	MH299238	OTU_1	MH299042	107110	1798	0	0	0	0	0	0	108908	98.3%	1.7%	0.0%	0.0%	0.0%	0.0%	0.0%	0.0%	2
150439	140	Lasallia pustulata	-		-		74107	7861	0	0	0	0	0	0	81968	90.4%	9.6%	0.0%	0.0%	0.0%	0.0%	0.0%	0.0%	2
150440	141	Lasallia pustulata	OTU_1	MH299239	OTU_1	MH299043	88940	2047	0	0	0	0	0	0	90987	97.8%	2.2%	0.0%	0.0%	0.0%	0.0%	0.0%	0.0%	2
150441	142	Lasallia pustulata	OTU_1	MH299240	OTU_1	MH299044	59267	15262	0	0	0	0	0	0	74529	79.5%	20.5%	0.0%	0.0%	0.0%	0.0%	0.0%	0.0%	4
150442	143	Lasallia pustulata	OTU_1	MH299241	OTU_1	MH299045	91138	0	0	0	0	0	0	0	91138	100.0%	0.0%	0.0%	0.0%	0.0%	0.0%	0.0%	0.0%	1
150443	144	Lasallia pustulata	OTU_2	MH299242	OTU_2	MH299046	7249	71916	0	0	0	0	0	0	79165	9.2%	90.8%	0.0%	0.0%	0.0%	0.0%	0.0%	0.0%	2
150444	145	Lasallia pustulata	OTU_2	MH299243	OTU_2	MH299047	10750	54106	0	0	0	0	0	0	64856	16.6%	83.4%	0.0%	0.0%	0.0%	0.0%	0.0%	0.0%	3
150445	146	Lasallia pustulata	OTU_1	MH299244	OTU_1	MH299048	89795	2345	0	0	0	0	0	0	92140	97.5%	2.5%	0.0%	0.0%	0.0%	0.0%	0.0%	0.0%	2
150446	147	Lasallia pustulata	-		-		38826	37799	0	0	0	0	0	0	76625	50.7%	49.3%	0.0%	0.0%	0.0%	0.0%	0.0%	0.0%	5
150447	148	Lasallia pustulata	OTU_1	MH299245	OTU_1	MH299049	82980	14610	0	0	0	0	0	0	97590	85.0%	15.0%	0.0%	0.0%	0.0%	0.0%	0.0%	0.0%	3
150448	149	Lasallia pustulata	OTU_1	MH299246	OTU_1	MH299050	68127	14114	0	0	0	0	0	0	82241	82.8%	17.2%	0.0%	0.0%	0.0%	0.0%	0.0%	0.0%	3
150449	150	Lasallia pustulata	OTU_1	MH299247	OTU_1	MH299051	52631	15655	0	0	0	0	0	0	68286	77.1%	22.9%	0.0%	0.0%	0.0%	0.0%	0.0%	0.0%	4
150450	151	Lasallia pustulata	OTU_2	MH299248	OTU_2	MH299052	8462	84022	0	0	0	0	0	0	92484	9.1%	90.9%	0.0%	0.0%	0.0%	0.0%	0.0%	0.0%	2
150451	152	Lasallia pustulata	OTU_2	MH299249	OTU_2	MH299053	10050	53392	0	0	0	0	0	0	63442	15.8%	84.2%	0.0%	0.0%	0.0%	0.0%	0.0%	0.0%	3
150452	153	Lasallia pustulata	OTU_1	MH299250	OTU_1	MH299054	76918	2682	0	0	0	0	0	0	79600	96.6%	3.4%	0.0%	0.0%	0.0%	0.0%	0.0%	0.0%	2
150453	154	Lasallia pustulata	-		-		24048	55694	0	0	0	0	0	0	79742	30.2%	69.8%	0.0%	0.0%	0.0%	0.0%	0.0%	0.0%	5
150454	155	Lasallia pustulata	OTU_2	MH299251	OTU_2	MH299055	16378	69043	0	0	0	0	0	0	85421	19.2%	80.8%	0.0%	0.0%	0.0%	0.0%	0.0%	0.0%	3
150455	156	Lasallia pustulata	-		-		25987	60114	0	0	0	0	0	0	86101	30.2%	69.8%	0.0%	0.0%	0.0%	0.0%	0.0%	0.0%	5
150456	157	Lasallia pustulata	OTU_1	MH299252	OTU_1	MH299056	74652	9327	0	0	0	0	0	0	83979	88.9%	11.1%	0.0%	0.0%	0.0%	0.0%	0.0%	0.0%	3
150457	158	Lasallia pustulata	OTU_1	MH299253	OTU_1	MH299057	87123	2367	0	0	0	0	0	0	89490	97.4%	2.6%	0.0%	0.0%	0.0%	0.0%	0.0%	0.0%	2
150458	159	Lasallia pustulata	OTU_1	MH299254	OTU_1	MH299058	66553	5067	0	0	0	0	0	0	71620	92.9%	7.1%	0.0%	0.0%	0.0%	0.0%	0.0%	0.0%	2
150459	160	Lasallia pustulata	OTU_1	MH299255	OTU_1	MH299059	68351	6201	0	0	0	0	0	0	74552	91.7%	8.3%	0.0%	0.0%	0.0%	0.0%	0.0%	0.0%	2
150460	161	Lasallia pustulata	OTU_1	MH299256	OTU_1	MH299060	213361	24428	0	0	0	0	0	0	237789	89.7%	10.3%	0.0%	0.0%	0.0%	0.0%	0.0%	0.0%	3
150461	162	Lasallia pustulata	OTU_1	MH299257	OTU_1	MH299061	93270	21148	0	0	0	0	0	0	114418	81.5%	18.5%	0.0%	0.0%	0.0%	0.0%	0.0%	0.0%	3
150462	163	Lasallia pustulata	-		OTU_2	MH299062	17497	71340	0	0	0	0	0	0	88837	19.7%	80.3%	0.0%	0.0%	0.0%	0.0%	0.0%	0.0%	3
150463	164	Lasallia pustulata	OTU_1	MH299258	OTU_1	MH299063	104814	7569	0	0	0	0	0	0	112383	93.3%	6.7%	0.0%	0.0%	0.0%	0.0%	0.0%	0.0%	2
150464	165	Lasallia pustulata	OTU_2	MH299259	OTU_2	MH299064	20346	91671	0	0	0	0	0	0	112017	18.2%	81.8%	0.0%	0.0%	0.0%	0.0%	0.0%	0.0%	3
150465	166	Lasallia pustulata	OTU_1	MH299260	OTU_1	MH299065	109471	3405	0	0	0	0	0	0	112876	97.0%	3.0%	0.0%	0.0%	0.0%	0.0%	0.0%	0.0%	2
150466	167	Lasallia pustulata	OTU_2	MH299261	OTU_2	MH299066	10539	62974	0	0	0	0	0	0	73513	14.3%	85.7%	0.0%	0.0%	0.0%	0.0%	0.0%	0.0%	3
150467	168	Lasallia pustulata	-		OTU_2	MH299067	29595	109196	0	0	0	0	0	0	138791	21.3%	78.7%	0.0%	0.0%	0.0%	0.0%	0.0%	0.0%	4
150468	169	Lasallia pustulata	OTU_2	MH299262	OTU_2	MH299068	21725	99642	0	0	0	0	0	0	121367	17.9%	82.1%	0.0%	0.0%	0.0%	0.0%	0.0%	0.0%	3
150469	170	Lasallia pustulata	OTU_1	MH299263	OTU_1	MH299069	55910	15590	0	0	0	0	0	0	71500	78.2%	21.8%	0.0%	0.0%	0.0%	0.0%	0.0%	0.0%	4
150470	171	Lasallia pustulata	OTU_1	MH299264	OTU_1	MH299070	100785	7915	0	0	0	0	0	0	108700	92.7%	7.3%	0.0%	0.0%	0.0%	0.0%	0.0%	0.0%	2
150471	172	Lasallia pustulata	OTU_2	MH299265	-		16555	87135	0	0	0	0	0	0	103690	16.0%	84.0%	0.0%	0.0%	0.0%	0.0%	0.0%	0.0%	3
150472	173	Lasallia pustulata	OTU_2	MH299266	OTU_2	MH299071	16597	73766	0	0	0	0	0	0	90363	18.4%	81.6%	0.0%	0.0%	0.0%	0.0%	0.0%	0.0%	3
150473	174	Lasallia pustulata	-		-		27575	65213	0	0	0	0	0	0	92788	29.7%	70.3%	0.0%	0.0%	0.0%	0.0%	0.0%	0.0%	4
150474	175	Lasallia pustulata	-		OTU_2	MH299072	14883	57179	0	0	0	0	0	0	72062	20.7%	79.3%	0.0%	0.0%	0.0%	0.0%	0.0%	0.0%	4
150475	176	Lasallia pustulata	-		OTU_1	MH299073	54418	14852	0	0	0	0	0	0	69270	78.6%	21.4%	0.0%	0.0%	0.0%	0.0%	0.0%	0.0%	4
150476	177	Lasallia pustulata	-		OTU_2	MH299074	11921	32881	0	0	0	0	0	0	44802	26.6%	73.4%	0.0%	0.0%	0.0%	0.0%	0.0%	0.0%	4
150477	178	Lasallia pustulata	-		OTU_1	MH299075	32645	6044	0	0	0	0	0	0	38689	84.4%	15.6%	0.0%	0.0%	0.0%	0.0%	0.0%	0.0%	3
150478	179	Lasallia pustulata	-		-		24244	32165	0	0	0	0	0	0	56409	43.0%	57.0%	0.0%	0.0%	0.0%	0.0%	0.0%	0.0%	5
150479	180	Lasallia pustulata	-		-		17196	28957	0	0	0	0	0	0	46153	37.3%	62.7%	0.0%	0.0%	0.0%	0.0%	0.0%	0.0%	5
150480	181	Lasallia pustulata	OTU_1	MH299267	OTU_1	MH299076	50448	3751	0	0	0	0	0	0	54199	93.1%	6.9%	0.0%	0.0%	0.0%	0.0%	0.0%	0.0%	2
150481	182	Lasallia pustulata	OTU_1	MH299268	OTU_1	MH299077	47662	2441	0	0	0	0	0	0	50103	95.1%	4.9%	0.0%	0.0%	0.0%	0.0%	0.0%	0.0%	2
150482	183	Lasallia pustulata	OTU_1	MH299269	OTU_1	MH299078	28659	2970	0	0	0	0	0	0	31629	90.6%	9.4%	0.0%	0.0%	0.0%	0.0%	0.0%	0.0%	2
150483	184	Lasallia pustulata	OTU_1	MH299270	OTU_1	MH299079	29072	4908	0	0	0	0	0	0	33980	85.6%	14.4%	0.0%	0.0%	0.0%	0.0%	0.0%	0.0%	3
150484	185	Lasallia pustulata	-		-		16110	32216	0	0	0	0	0	0	48326	33.3%	66.7%	0.0%	0.0%	0.0%	0.0%	0.0%	0.0%	5
150485	186	Lasallia pustulata	-		OTU_1	MH299080	46392	3840	0	0	0	0	0	0	50232	92.4%	7.6%	0.0%	0.0%	0.0%	0.0%	0.0%	0.0%	2
150486	187	Lasallia pustulata	-		OTU_2	MH299081	12548	34007	0	0	0	0	0	0	46555	27.0%	73.0%	0.0%	0.0%	0.0%	0.0%	0.0%	0.0%	4
150487	188	Lasallia pustulata	-		OTU_1	MH299082	56123	3649	0	0	0	0	0	0	59772	93.9%	6.1%	0.0%	0.0%	0.0%	0.0%	0.0%	0.0%	2
150488	189	Lasallia pustulata	-		OTU_1	MH299083	56756	3385	0	0	0	0	0	0	60141	94.4%	5.6%	0.0%	0.0%	0.0%	0.0%	0.0%	0.0%	2
150489	190	Lasallia pustulata	-		OTU_2	MH299084	16872	47589	0	0	0	0	0	0	64461	26.2%	73.8%	0.0%	0.0%	0.0%	0.0%	0.0%	0.0%	4
150490	191	Lasallia pustulata	-		OTU_1	MH299085	41609	10919	0	0	0	0	0	0	52528	79.2%	20.8%	0.0%	0.0%	0.0%	0.0%	0.0%	0.0%	4
150491	192	Lasallia pustulata	-		OTU_1	MH299086	32207	11837	0	0	0	0	0	0	44044	73.1%	26.9%	0.0%	0.0%	0.0%	0.0%	0.0%	0.0%	4
150492	193	Lasallia pustulata	-		-		64209	22337	1383	0	0	0	0	0	87929	73.0%	25.4%	1.6%	0.0%	0.0%	0.0%	0.0%	0.0%	4
150493	194	Lasallia pustulata	OTU_1	MH299271	-		105539	6190	0	0	0	0	0	0	111729	94.5%	5.5%	0.0%	0.0%	0.0%	0.0%	0.0%	0.0%	2
150494	195	Lasallia pustulata	OTU_1	MH299272	OTU_1	MH299087	133832	7914	0	0	0	0	0	0	141746	94.4%	5.6%	0.0%	0.0%	0.0%	0.0%	0.0%	0.0%	2
150495	196	Lasallia pustulata	OTU_1	MH299273	OTU_1	MH299088	105254	6188	1330	0	0	0	0	0	112772	93.3%	5.5%	1.2%	0.0%	0.0%	0.0%	0.0%	0.0%	2
150496	197	Lasallia pustulata	OTU_1	MH299274	-		104531	7671	0	0	0	0	0	0	112202	93.2%	6.8%	0.0%	0.0%	0.0%	0.0%	0.0%	0.0%	2
150497	198	Lasallia pustulata	-		OTU_1	MH299089	101041	6173	1499	0	0	0	0	0	108713	92.9%	5.7%	1.4%	0.0%	0.0%	0.0%	0.0%	0.0%	2
150498	199	Lasallia pustulata	OTU_1	MH299275	OTU_1	MH299090	89920	6507	0	0	0	0	0	0	96427	93.3%	6.7%	0.0%	0.0%	0.0%	0.0%	0.0%	0.0%	2
150499	200	Lasallia pustulata	OTU_1	MH299276	-		77189	2239	0	0	0	0	0	0	79428	97.2%	2.8%	0.0%	0.0%	0.0%	0.0%	0.0%	0.0%	2
150500	201	Lasallia pustulata	OTU_1	MH299277	OTU_1	MH299091	99202	10063	1412	0	0	0	0	0	110677	89.6%	9.1%	1.3%	0.0%	0.0%	0.0%	0.0%	0.0%	2
150501	202	Lasallia pustulata	OTU_2	MH299278	OTU_2	MH299092	12189	58515	0	0	0	0	0	0	70704	17.2%	82.8%	0.0%	0.0%	0.0%	0.0%	0.0%	0.0%	3
150502	203	Lasallia pustulata	OTU_2	MH299279	OTU_2	MH299093	16175	116619	0	0	0	0	0	0	132794	12.2%	87.8%	0.0%	0.0%	0.0%	0.0%	0.0%	0.0%	3
150503	204	Lasallia pustulata	OTU_2	MH299280	OTU_2	MH299094	16710	104070	0	0	0	0	0	0	120780	13.8%	86.2%	0.0%	0.0%	0.0%	0.0%	0.0%	0.0%	3
150504	205	Lasallia pustulata	-		-		6310	2256	91678	0	0	0	0	0	100244	6.3%	2.3%	91.5%	0.0%	0.0%	0.0%	0.0%	0.0%	2
150505	206	Lasallia pustulata	-		OTU_2	MH299095	21042	71886	1451	0	0	0	0	0	94379	22.3%	76.2%	1.5%	0.0%	0.0%	0.0%	0.0%	0.0%	4
150506	207	Lasallia pustulata	-		OTU_3	MH299096	8753	3119	88469	0	0	0	0	0	100341	8.7%	3.1%	88.2%	0.0%	0.0%	0.0%	0.0%	0.0%	2
150507	208	Lasallia pustulata	-		OTU_2	MH299097	15263	61640	0	0	0	0	0	0	76903	19.8%	80.2%	0.0%	0.0%	0.0%	0.0%	0.0%	0.0%	3
150508	209	Lasallia pustulata	OTU_3	MH299281	OTU_3	MH299098	2029	1480	103509	0	0	0	0	0	107018	1.9%	1.4%	96.7%	0.0%	0.0%	0.0%	0.0%	0.0%	2
150509	210	Lasallia pustulata	-		-		55206	43039	4041	0	0	0	0	0	102286	54.0%	42.1%	4.0%	0.0%	0.0%	0.0%	0.0%	0.0%	5
150510	211	Lasallia pustulata	-		OTU_1	MH299099	49969	18202	3687	0	0	0	0	0	71858	69.5%	25.3%	5.1%	0.0%	0.0%	0.0%	0.0%	0.0%	4
150511	212	Lasallia pustulata	OTU_3	MH299282	OTU_3	MH299100	2539	1384	120224	0	0	0	0	0	124147	2.0%	1.1%	96.8%	0.0%	0.0%	0.0%	0.0%	0.0%	2
150512	213	Lasallia pustulata	-		OTU_2	MH299101	18776	65912	3455	0	0	0	0	0	88143	21.3%	74.8%	3.9%	0.0%	0.0%	0.0%	0.0%	0.0%	4
150513	214	Lasallia pustulata	OTU_3	MH299283	OTU_3	MH299102	2441	0	106159	0	0	0	0	0	108600	2.2%	0.0%	97.8%	0.0%	0.0%	0.0%	0.0%	0.0%	2
150514	215	Lasallia pustulata	OTU_3	MH299284	OTU_3	MH299103	1527	1623	58697	0	0	7811	0	0	69658	2.2%	2.3%	84.3%	0.0%	0.0%	11.2%	0.0%	0.0%	3
150515	216	Lasallia pustulata	OTU_3	MH299285	OTU_3	MH299104	1606	1400	77335	0	0	0	0	0	80341	2.0%	1.7%	96.3%	0.0%	0.0%	0.0%	0.0%	0.0%	2
150516	217	Lasallia pustulata	OTU_3	MH299286	-		3378	3002	121207	0	0	0	0	0	127587	2.6%	2.4%	95.0%	0.0%	0.0%	0.0%	0.0%	0.0%	2
150517	218	Lasallia pustulata	OTU_2	MH299287	OTU_2	MH299105	12188	86196	4159	0	0	0	0	0	102543	11.9%	84.1%	4.1%	0.0%	0.0%	0.0%	0.0%	0.0%	3
150518	219	Lasallia pustulata	-		OTU_2	MH299106	11865	81452	4197	0	0	0	0	0	97514	12.2%	83.5%	4.3%	0.0%	0.0%	0.0%	0.0%	0.0%	3
150519	220	Lasallia pustulata	OTU_1	MH299288	-		71651	4093	3361	0	0	0	0	0	79105	90.6%	5.2%	4.2%	0.0%	0.0%	0.0%	0.0%	0.0%	2
150520	221	Lasallia pustulata	OTU_3	MH299289	OTU_3	MH299107	3600	2409	102056	0	0	0	0	0	108065	3.3%	2.2%	94.4%	0.0%	0.0%	0.0%	0.0%	0.0%	2
150521	222	Lasallia pustulata	OTU_3	MH299290	OTU_3	MH299108	2238	1679	106183	0	0	0	0	0	110100	2.0%	1.5%	96.4%	0.0%	0.0%	0.0%	0.0%	0.0%	2
150522	223	Lasallia pustulata	OTU_3	MH299291	OTU_3	MH299109	2319	0	157081	0	0	0	0	0	159400	1.5%	0.0%	98.5%	0.0%	0.0%	0.0%	0.0%	0.0%	2
150523	224	Lasallia pustulata	OTU_3	MH299292	OTU_3	MH299110	1729	1430	89037	0	0	0	0	0	92196	1.9%	1.6%	96.6%	0.0%	0.0%	0.0%	0.0%	0.0%	2
150524	225	Lasallia pustulata	OTU_3	MH299293	OTU_3	MH299111	1212	0	105287	0	0	0	0	0	106499	1.1%	0.0%	98.9%	0.0%	0.0%	0.0%	0.0%	0.0%	2
150525	226	Lasallia pustulata	OTU_3	MH299294	OTU_3	MH299112	2291	0	109025	0	0	0	0	0	111316	2.1%	0.0%	97.9%	0.0%	0.0%	0.0%	0.0%	0.0%	2
150526	227	Lasallia pustulata	OTU_3	MH299295	OTU_3	MH299113	1817	0	94563	0	0	0	0	0	96380	1.9%	0.0%	98.1%	0.0%	0.0%	0.0%	0.0%	0.0%	2
150527	228	Lasallia pustulata	OTU_3	MH299296	OTU_3	MH299114	2040	0	117937	0	0	0	0	0	119977	1.7%	0.0%	98.3%	0.0%	0.0%	0.0%	0.0%	0.0%	2
150528	229	Lasallia pustulata	OTU_3	MH299297	OTU_3	MH299115	2090	0	78114	0	0	0	0	0	80204	2.6%	0.0%	97.4%	0.0%	0.0%	0.0%	0.0%	0.0%	2
150529	230	Lasallia pustulata	OTU_3	MH299298	-		2147	0	100245	0	0	0	0	0	102392	2.1%	0.0%	97.9%	0.0%	0.0%	0.0%	0.0%	0.0%	2
150530	231	Lasallia pustulata	OTU_3	MH299299	OTU_3	MH299116	1683	0	71997	0	0	0	0	0	73680	2.3%	0.0%	97.7%	0.0%	0.0%	0.0%	0.0%	0.0%	2
150531	232	Lasallia pustulata	OTU_3	MH299300	OTU_3	MH299117	1341	0	6509	0	0	0	0	0	7850	17.1%	0.0%	82.9%	0.0%	0.0%	0.0%	0.0%	0.0%	3
150532	233	Lasallia pustulata	OTU_3	MH299301	OTU_3	MH299118	2177	0	118467	0	0	0	0	0	120644	1.8%	0.0%	98.2%	0.0%	0.0%	0.0%	0.0%	0.0%	2
150533	234	Lasallia pustulata	OTU_3	MH299302	OTU_3	MH299119	2451	1317	101134	0	0	0	0	0	104902	2.3%	1.3%	96.4%	0.0%	0.0%	0.0%	0.0%	0.0%	2
150534	235	Lasallia pustulata	OTU_3	MH299303	OTU_3	MH299120	1774	0	100834	0	0	0	0	0	102608	1.7%	0.0%	98.3%	0.0%	0.0%	0.0%	0.0%	0.0%	2
150535	236	Lasallia pustulata	-		-		25671	49754	3544	0	0	0	0	0	78969	32.5%	63.0%	4.5%	0.0%	0.0%	0.0%	0.0%	0.0%	5
150536	237	Lasallia pustulata	-		-		2187	0	82229	0	0	0	0	0	84416	2.6%	0.0%	97.4%	0.0%	0.0%	0.0%	0.0%	0.0%	2
150537	238	Lasallia pustulata	OTU_3	MH299304	OTU_3	MH299121	1879	0	80280	0	0	0	0	0	82159	2.3%	0.0%	97.7%	0.0%	0.0%	0.0%	0.0%	0.0%	2
150538	239	Lasallia pustulata	-		-		2119	0	59329	0	0	0	0	0	61448	3.4%	0.0%	96.6%	0.0%	0.0%	0.0%	0.0%	0.0%	2
150539	240	Lasallia pustulata	-		-		12220	51730	3222	0	0	0	0	0	67172	18.2%	77.0%	4.8%	0.0%	0.0%	0.0%	0.0%	0.0%	3
