# Supplementary material for: Comparing Sanger sequencing and high-throughput metabarcoding for inferring photobiont diversity in lichens
Source: Sci Rep. 2018 Jun 5;8:8624. doi: 10.1038/s41598-018-26947-8 (PMC5988838; doi:10.1038/s41598-018-26947-8)
Supplement: Supplementary file 1 — Supplementary Table S1 [file 41598_2018_26947_MOESM1_ESM.xlsx]

## Sheet: Sheet1
Supplementary Table S1. Rates of sequencing success based on the relative abundance of the second most abundant photobiont.
			full length ITS			ITS2
Category	Frequency second most abundant photobiont	# of samples	sequences	failure	rate of success	sequences	failure	rate of success
1	0.00%	61	61	0	100.00%	54	7	88.52%
2	<10%	96	83	13	86.46%	83	13	86.46%
3	10-20%	41	34	7	82.93%	39	2	95.12%
4	20-30%	26	5	21	19.23%	22	4	84.62%
5	>30%	16	0	16	0.00%	0	16	0.00%
