# Supplementary material for: Comparing Sanger sequencing and high-throughput metabarcoding for inferring photobiont diversity in lichens
Source: Sci Rep. 2018 Jun 5;8:8624. doi: 10.1038/s41598-018-26947-8 (PMC5988838; doi:10.1038/s41598-018-26947-8)
Supplement: Supplementary file 3 — Supplementary Table S3 [file 41598_2018_26947_MOESM3_ESM.xlsx]

## Sheet: Sheet1
Supplementary Table S3. Comparison of OTUs detected via Sanger sequencing (extracted ITS1 from full length ITS and ITS2) and Illumina ITS2 metabarcoding.
		Sanger		Illumina MiSeq
DNA number	Host	ITS1	ITS2	OTU_1	OTU_2	OTU_3	OTU_4	OTU_5	OTU_6	OTU_15	OTU_16
150300	Lasallia hispanica	OTU_5	OTU_5	3605	0	0	1412	112935	0	0	0
150301	Lasallia hispanica	OTU_5	OTU_5	11356	0	0	1332	97310	0	0	0
150302	Lasallia hispanica	OTU_5	no seq	3084	0	0	1545	104027	0	0	0
150303	Lasallia hispanica	OTU_4	OTU_4	4184	0	0	51276	3735	0	2208	2367
150304	Lasallia hispanica	OTU_4	OTU_4	4032	0	0	77555	2021	0	0	0
150305	Lasallia hispanica	OTU_6	OTU_6	4742	0	0	1490	2940	107693	0	0
150306	Lasallia hispanica	OTU_1	OTU_1	76214	0	0	0	1238	0	0	0
150307	Lasallia hispanica	OTU_1	OTU_1	73628	0	0	0	1508	0	0	0
150308	Lasallia hispanica	OTU_4	OTU_4	5432	0	0	120732	4123	0	0	1200
150309	Lasallia hispanica	no seq	OTU_5	20626	0	0	1428	62076	0	0	0
150310	Lasallia hispanica	OTU_1	OTU_1	93182	0	0	1451	1565	0	0	0
150311	Lasallia hispanica	OTU_5	OTU_5	6005	0	0	0	82835	0	0	0
150312	Lasallia hispanica	OTU_1	OTU_1	78173	0	0	0	1793	0	0	0
150313	Lasallia hispanica	OTU_4	OTU_4	4215	0	0	71107	2541	0	1659	1789
150314	Lasallia hispanica	OTU_1	OTU_1	135227	0	0	1218	1606	0	0	0
150315	Lasallia hispanica	OTU_6	OTU_6	10077	0	0	3639	9371	64544	0	0
150316	Lasallia hispanica	OTU_1	OTU_1	79530	0	0	0	0	0	0	0
150317	Lasallia hispanica	OTU_4	OTU_4	6051	0	0	59205	7396	0	5429	6005
150318	Lasallia hispanica	OTU_5	OTU_5	7892	0	0	0	63001	0	0	0
150319	Lasallia hispanica	OTU_1	OTU_1	76428	0	0	0	0	0	0	0
150320	Lasallia hispanica	OTU_1	OTU_1	72053	0	0	0	0	0	0	0
150321	Lasallia hispanica	OTU_1	OTU_1	76318	0	0	0	0	0	0	0
150322	Lasallia hispanica	OTU_1	OTU_1	37703	0	0	0	0	0	0	0
150323	Lasallia hispanica	OTU_1	OTU_1	38880	0	0	0	0	0	0	0
150324	Lasallia hispanica	OTU_1	OTU_1	73064	0	0	0	0	0	0	0
150325	Lasallia hispanica	OTU_1	OTU_1	80776	0	0	0	0	0	0	0
150326	Lasallia hispanica	OTU_1	OTU_1	88121	0	0	0	0	0	0	0
150327	Lasallia hispanica	OTU_1	OTU_1	70317	0	0	0	0	0	0	0
150328	Lasallia hispanica	OTU_1	OTU_1	119213	0	0	0	0	0	0	0
150329	Lasallia hispanica	OTU_1	OTU_1	63519	0	0	0	0	0	0	0
150330	Lasallia hispanica	OTU_1	OTU_1	60806	0	0	0	0	0	0	0
150331	Lasallia hispanica	OTU_1	no seq	52142	0	0	0	0	0	0	0
150332	Lasallia hispanica	OTU_4	no seq	8140	0	0	96930	8809	0	7973	8318
150333	Lasallia hispanica	OTU_1	OTU_1	135154	0	0	0	0	0	0	0
150334	Lasallia hispanica	OTU_1	OTU_1	93858	0	0	0	0	0	0	0
150335	Lasallia hispanica	OTU_1	OTU_1	133737	0	0	0	0	0	0	0
150336	Lasallia hispanica	OTU_1	OTU_1	138617	0	0	0	0	0	0	0
150337	Lasallia hispanica	OTU_1	OTU_1	138320	0	0	0	0	0	0	0
150338	Lasallia hispanica	OTU_1	no seq	67534	0	0	0	0	0	0	0
150339	Lasallia hispanica	OTU_1	no seq	91758	0	0	0	0	0	0	0
150340	Lasallia hispanica	OTU_1	OTU_1	141760	0	0	0	0	0	0	0
150341	Lasallia hispanica	OTU_1	OTU_1	128528	0	0	0	0	0	0	0
150342	Lasallia hispanica	OTU_1	OTU_1	112920	0	0	0	0	0	0	0
150343	Lasallia hispanica	OTU_1	OTU_1	84632	0	0	0	0	0	0	0
150344	Lasallia hispanica	OTU_1	OTU_1	111561	0	0	0	0	0	0	0
150345	Lasallia hispanica	OTU_1	OTU_1	112312	0	0	0	0	0	0	0
150346	Lasallia hispanica	OTU_1	OTU_1	93942	0	0	0	0	0	0	0
150347	Lasallia hispanica	OTU_1	OTU_1	96511	0	0	0	0	0	0	0
150348	Lasallia hispanica	OTU_1	OTU_1	101904	0	0	0	0	0	0	0
150349	Lasallia hispanica	OTU_1	no seq	101459	0	0	0	0	0	0	0
150350	Lasallia hispanica	OTU_1	no seq	104699	0	0	0	0	0	0	0
150351	Lasallia hispanica	OTU_1	OTU_1	79740	0	0	0	0	0	0	0
150352	Lasallia hispanica	OTU_1	OTU_1	90382	0	0	0	0	0	0	0
150353	Lasallia hispanica	OTU_1	OTU_1	106435	0	0	0	0	0	0	0
150354	Lasallia hispanica	OTU_1	OTU_1	82651	0	0	0	0	0	0	0
150355	Lasallia hispanica	OTU_1	no seq	73132	0	0	0	0	0	0	0
150356	Lasallia hispanica	OTU_1	OTU_1	101469	0	0	0	0	0	0	0
150357	Lasallia hispanica	OTU_1	OTU_1	153665	0	0	0	0	0	0	0
150358	Lasallia hispanica	OTU_4	OTU_4	7606	0	0	80991	0	0	1461	1546
150359	Lasallia hispanica	OTU_1	OTU_1	90349	0	0	0	0	0	0	0
150360	Lasallia hispanica	OTU_1	OTU_1	90104	0	0	0	0	0	0	0
150361	Lasallia hispanica	OTU_1	OTU_1	115157	0	0	0	0	0	0	0
150362	Lasallia hispanica	OTU_1	OTU_1	77968	0	0	0	0	0	0	0
150363	Lasallia hispanica	OTU_1	OTU_1	78275	0	0	0	0	0	0	0
150364	Lasallia hispanica	OTU_1	OTU_1	88336	0	0	0	0	0	0	0
150365	Lasallia hispanica	OTU_1	OTU_1	72663	9670	0	0	0	0	0	0
150366	Lasallia hispanica	OTU_1	OTU_1	81858	0	0	0	0	0	0	0
150367	Lasallia hispanica	OTU_1	OTU_1	94925	0	0	0	0	0	0	0
150368	Lasallia hispanica	OTU_1	OTU_1	84735	0	0	0	0	0	0	0
150369	Lasallia hispanica	OTU_1	OTU_1	91109	0	0	0	0	0	0	0
150370	Lasallia hispanica	OTU_1	OTU_1	57900	0	0	0	0	0	0	0
150371	Lasallia hispanica	OTU_1	no seq	74824	0	0	0	0	0	0	0
150372	Lasallia hispanica	OTU_1	OTU_1	95396	0	0	0	0	0	0	0
150373	Lasallia hispanica	OTU_1	OTU_1	185514	0	0	0	0	0	0	0
150374	Lasallia hispanica	OTU_1	OTU_1	127825	0	0	0	0	0	0	0
150375	Lasallia hispanica	OTU_1	OTU_1	86262	0	0	0	0	0	0	0
150376	Lasallia hispanica	OTU_1	OTU_1	70036	0	0	0	0	0	0	0
150377	Lasallia hispanica	OTU_1	OTU_1	93562	0	0	0	0	0	0	0
150378	Lasallia hispanica	OTU_1	OTU_1	83381	0	0	0	0	0	0	0
150379	Lasallia hispanica	OTU_1	OTU_1	80084	0	0	0	0	0	0	0
150380	Lasallia hispanica	no seq	OTU_4	3348	1318	0	72931	7119	0	4858	5629
150381	Lasallia hispanica	OTU_1	OTU_1	76194	12505	0	2573	0	0	0	0
150382	Lasallia hispanica	OTU_4	OTU_4	2568	1292	0	82543	5362	0	3881	4458
150383	Lasallia hispanica	no seq	no seq	3342	1510	0	34579	41495	0	8682	9804
150384	Lasallia hispanica	OTU_1	OTU_1	98912	1548	0	1909	0	0	0	0
150385	Lasallia hispanica	OTU_4	OTU_4	3356	0	0	86339	10891	0	8140	8906
150386	Lasallia hispanica	OTU_2	OTU_2	19455	83236	0	1467	0	0	0	0
150387	Lasallia hispanica	OTU_2	OTU_2	16776	78477	0	1652	0	0	0	0
150388	Lasallia hispanica	OTU_1	OTU_1	93518	11054	0	2398	0	0	0	0
150389	Lasallia hispanica	OTU_4	OTU_4	5387	1617	0	145005	0	0	0	0
150390	Lasallia hispanica	no seq	no seq	2853	1637	0	28324	0	44107	0	0
150391	Lasallia hispanica	no seq	OTU_5	23498	3273	0	4077	78204	1935	0	0
150392	Lasallia hispanica	OTU_5	OTU_5	3611	0	0	1933	89701	0	0	0
150393	Lasallia hispanica	OTU_6	OTU_6	3080	1575	0	2409	0	98578	0	0
150394	Lasallia hispanica	OTU_4	OTU_4	3112	0	0	67722	5092	0	4506	5127
150395	Lasallia hispanica	OTU_4	OTU_4	2399	1305	0	72703	0	0	0	0
150396	Lasallia hispanica	OTU_1	OTU_1	90884	3014	0	0	0	0	0	0
150397	Lasallia hispanica	no seq	OTU_2	19559	67815	0	1298	0	0	0	0
150398	Lasallia hispanica	OTU_4	OTU_4	3262	2922	0	118465	0	0	0	0
150399	Lasallia hispanica	OTU_4	OTU_4	4202	2818	0	62306	4737	0	4214	4213
150400	Lasallia hispanica	no seq	no seq	37296	76769	0	0	0	0	0	0
150401	Lasallia hispanica	OTU_1	OTU_1	98234	12641	0	0	0	0	0	0
150402	Lasallia hispanica	no seq	OTU_2	15012	56733	0	0	0	0	0	0
150403	Lasallia hispanica	no seq	no seq	2838	2929	0	25063	37449	0	6067	5628
150404	Lasallia hispanica	no seq	no seq	29945	81467	0	0	0	0	0	0
150405	Lasallia hispanica	no seq	OTU_2	19037	80363	0	0	0	0	0	0
150406	Lasallia hispanica	OTU_6	OTU_6	3779	3444	0	0	0	93916	0	0
150407	Lasallia hispanica	no seq	no seq	19781	56235	0	0	0	0	0	0
150408	Lasallia hispanica	no seq	no seq	25481	45440	0	0	0	0	0	0
150409	Lasallia hispanica	no seq	OTU_2	15686	72261	0	0	0	0	0	0
150410	Lasallia hispanica	OTU_1	OTU_1	50092	10589	0	0	0	0	0	0
150411	Lasallia hispanica	no seq	no seq	27184	62706	0	0	0	0	0	0
150412	Lasallia hispanica	OTU_2	OTU_2	23657	73437	0	0	0	0	0	0
150413	Lasallia hispanica	OTU_1	OTU_1	152419	22093	0	0	0	0	0	0
150414	Lasallia hispanica	no seq	OTU_6	6832	2559	0	0	0	92531	0	0
150415	Lasallia hispanica	no seq	OTU_2	38444	92572	0	0	0	0	0	0
150416	Lasallia hispanica	no seq	no seq	27285	58536	0	0	0	0	0	0
150417	Lasallia hispanica	OTU_6	OTU_6	9136	2229	0	0	0	153561	0	0
150418	Lasallia hispanica	OTU_2	OTU_2	26775	102501	0	0	0	0	0	0
150419	Lasallia hispanica	OTU_2	OTU_2	25396	109299	0	0	0	0	0	0
150420	Lasallia pustulata	OTU_1	OTU_1	135957	4656	0	0	0	1328	0	0
150421	Lasallia pustulata	OTU_1	OTU_1	154745	3346	0	0	0	2275	0	0
150422	Lasallia pustulata	OTU_1	OTU_1	103523	16275	0	0	0	0	0	0
150423	Lasallia pustulata	OTU_1	OTU_1	131591	3195	0	0	0	0	0	0
150424	Lasallia pustulata	OTU_1	OTU_1	194810	2116	0	0	0	0	0	0
150425	Lasallia pustulata	OTU_1	OTU_1	198296	2959	0	0	0	0	0	0
150426	Lasallia pustulata	OTU_1	OTU_1	148744	1949	0	0	0	0	0	0
150427	Lasallia pustulata	OTU_1	OTU_1	78576	2510	0	0	0	0	0	0
150428	Lasallia pustulata	OTU_1	OTU_1	67704	1324	0	0	0	0	0	0
150429	Lasallia pustulata	no seq	OTU_1	106217	1349	0	0	0	0	0	0
150430	Lasallia pustulata	no seq	no seq	42871	4646	0	0	0	0	0	0
150431	Lasallia pustulata	OTU_1	OTU_1	236128	1279	0	0	0	0	0	0
150432	Lasallia pustulata	OTU_1	OTU_1	77614	1387	0	0	0	0	0	0
150433	Lasallia pustulata	OTU_1	OTU_1	6957	0	0	0	0	0	0	0
150434	Lasallia pustulata	no seq	no seq	20610	43244	0	0	0	0	0	0
150435	Lasallia pustulata	OTU_1	OTU_1	49869	8008	0	0	0	0	0	0
150436	Lasallia pustulata	no seq	OTU_2	21511	76387	0	0	0	0	0	0
150437	Lasallia pustulata	OTU_1	OTU_1	113811	1867	0	0	0	0	0	0
150438	Lasallia pustulata	OTU_1	OTU_1	107110	1798	0	0	0	0	0	0
150439	Lasallia pustulata	no seq	no seq	74107	7861	0	0	0	0	0	0
150440	Lasallia pustulata	OTU_1	OTU_1	88940	2047	0	0	0	0	0	0
150441	Lasallia pustulata	OTU_1	OTU_1	59267	15262	0	0	0	0	0	0
150442	Lasallia pustulata	OTU_1	OTU_1	91138	0	0	0	0	0	0	0
150443	Lasallia pustulata	OTU_2	OTU_2	7249	71916	0	0	0	0	0	0
150444	Lasallia pustulata	OTU_2	OTU_2	10750	54106	0	0	0	0	0	0
150445	Lasallia pustulata	OTU_1	OTU_1	89795	2345	0	0	0	0	0	0
150446	Lasallia pustulata	no seq	no seq	38826	37799	0	0	0	0	0	0
150447	Lasallia pustulata	OTU_1	OTU_1	82980	14610	0	0	0	0	0	0
150448	Lasallia pustulata	OTU_1	OTU_1	68127	14114	0	0	0	0	0	0
150449	Lasallia pustulata	OTU_1	OTU_1	52631	15655	0	0	0	0	0	0
150450	Lasallia pustulata	OTU_2	OTU_2	8462	84022	0	0	0	0	0	0
150451	Lasallia pustulata	OTU_2	OTU_2	10050	53392	0	0	0	0	0	0
150452	Lasallia pustulata	OTU_1	OTU_1	76918	2682	0	0	0	0	0	0
150453	Lasallia pustulata	no seq	no seq	24048	55694	0	0	0	0	0	0
150454	Lasallia pustulata	OTU_2	OTU_2	16378	69043	0	0	0	0	0	0
150455	Lasallia pustulata	no seq	no seq	25987	60114	0	0	0	0	0	0
150456	Lasallia pustulata	OTU_1	OTU_1	74652	9327	0	0	0	0	0	0
150457	Lasallia pustulata	OTU_1	OTU_1	87123	2367	0	0	0	0	0	0
150458	Lasallia pustulata	OTU_1	OTU_1	66553	5067	0	0	0	0	0	0
150459	Lasallia pustulata	OTU_1	OTU_1	68351	6201	0	0	0	0	0	0
150460	Lasallia pustulata	OTU_1	OTU_1	213361	24428	0	0	0	0	0	0
150461	Lasallia pustulata	OTU_1	OTU_1	93270	21148	0	0	0	0	0	0
150462	Lasallia pustulata	no seq	OTU_2	17497	71340	0	0	0	0	0	0
150463	Lasallia pustulata	OTU_1	OTU_1	104814	7569	0	0	0	0	0	0
150464	Lasallia pustulata	OTU_2	OTU_2	20346	91671	0	0	0	0	0	0
150465	Lasallia pustulata	OTU_1	OTU_1	109471	3405	0	0	0	0	0	0
150466	Lasallia pustulata	OTU_2	OTU_2	10539	62974	0	0	0	0	0	0
150467	Lasallia pustulata	no seq	OTU_2	29595	109196	0	0	0	0	0	0
150468	Lasallia pustulata	OTU_2	OTU_2	21725	99642	0	0	0	0	0	0
150469	Lasallia pustulata	OTU_1	OTU_1	55910	15590	0	0	0	0	0	0
150470	Lasallia pustulata	OTU_1	OTU_1	100785	7915	0	0	0	0	0	0
150471	Lasallia pustulata	OTU_2	no seq	16555	87135	0	0	0	0	0	0
150472	Lasallia pustulata	OTU_2	OTU_2	16597	73766	0	0	0	0	0	0
150473	Lasallia pustulata	no seq	no seq	27575	65213	0	0	0	0	0	0
150474	Lasallia pustulata	no seq	OTU_2	14883	57179	0	0	0	0	0	0
150475	Lasallia pustulata	no seq	OTU_1	54418	14852	0	0	0	0	0	0
150476	Lasallia pustulata	no seq	OTU_2	11921	32881	0	0	0	0	0	0
150477	Lasallia pustulata	no seq	OTU_1	32645	6044	0	0	0	0	0	0
150478	Lasallia pustulata	no seq	no seq	24244	32165	0	0	0	0	0	0
150479	Lasallia pustulata	no seq	no seq	17196	28957	0	0	0	0	0	0
150480	Lasallia pustulata	OTU_1	OTU_1	50448	3751	0	0	0	0	0	0
150481	Lasallia pustulata	OTU_1	OTU_1	47662	2441	0	0	0	0	0	0
150482	Lasallia pustulata	OTU_1	OTU_1	28659	2970	0	0	0	0	0	0
150483	Lasallia pustulata	OTU_1	OTU_1	29072	4908	0	0	0	0	0	0
150484	Lasallia pustulata	no seq	no seq	16110	32216	0	0	0	0	0	0
150485	Lasallia pustulata	no seq	OTU_1	46392	3840	0	0	0	0	0	0
150486	Lasallia pustulata	no seq	OTU_2	12548	34007	0	0	0	0	0	0
150487	Lasallia pustulata	no seq	OTU_1	56123	3649	0	0	0	0	0	0
150488	Lasallia pustulata	no seq	OTU_1	56756	3385	0	0	0	0	0	0
150489	Lasallia pustulata	no seq	OTU_2	16872	47589	0	0	0	0	0	0
150490	Lasallia pustulata	no seq	OTU_1	41609	10919	0	0	0	0	0	0
150491	Lasallia pustulata	no seq	OTU_1	32207	11837	0	0	0	0	0	0
150492	Lasallia pustulata	no seq	no seq	64209	22337	1383	0	0	0	0	0
150493	Lasallia pustulata	OTU_1	no seq	105539	6190	0	0	0	0	0	0
150494	Lasallia pustulata	OTU_1	OTU_1	133832	7914	0	0	0	0	0	0
150495	Lasallia pustulata	OTU_1	OTU_1	105254	6188	1330	0	0	0	0	0
150496	Lasallia pustulata	OTU_1	no seq	104531	7671	0	0	0	0	0	0
150497	Lasallia pustulata	no seq	OTU_1	101041	6173	1499	0	0	0	0	0
150498	Lasallia pustulata	OTU_1	OTU_1	89920	6507	0	0	0	0	0	0
150499	Lasallia pustulata	OTU_1	no seq	77189	2239	0	0	0	0	0	0
150500	Lasallia pustulata	OTU_1	OTU_1	99202	10063	1412	0	0	0	0	0
150501	Lasallia pustulata	OTU_2	OTU_2	12189	58515	0	0	0	0	0	0
150502	Lasallia pustulata	OTU_2	OTU_2	16175	116619	0	0	0	0	0	0
150503	Lasallia pustulata	OTU_2	OTU_2	16710	104070	0	0	0	0	0	0
150504	Lasallia pustulata	no seq	no seq	6310	2256	91678	0	0	0	0	0
150505	Lasallia pustulata	no seq	OTU_2	21042	71886	1451	0	0	0	0	0
150506	Lasallia pustulata	no seq	OTU_3	8753	3119	88469	0	0	0	0	0
150507	Lasallia pustulata	no seq	OTU_2	15263	61640	0	0	0	0	0	0
150508	Lasallia pustulata	OTU_3	OTU_3	2029	1480	103509	0	0	0	0	0
150509	Lasallia pustulata	no seq	no seq	55206	43039	4041	0	0	0	0	0
150510	Lasallia pustulata	no seq	OTU_1	49969	18202	3687	0	0	0	0	0
150511	Lasallia pustulata	OTU_3	OTU_3	2539	1384	120224	0	0	0	0	0
150512	Lasallia pustulata	no seq	OTU_2	18776	65912	3455	0	0	0	0	0
150513	Lasallia pustulata	OTU_3	OTU_3	2441	0	106159	0	0	0	0	0
150514	Lasallia pustulata	OTU_3	OTU_3	1527	1623	58697	0	0	7811	0	0
150515	Lasallia pustulata	OTU_3	OTU_3	1606	1400	77335	0	0	0	0	0
150516	Lasallia pustulata	OTU_3	no seq	3378	3002	121207	0	0	0	0	0
150517	Lasallia pustulata	OTU_2	OTU_2	12188	86196	4159	0	0	0	0	0
150518	Lasallia pustulata	no seq	OTU_2	11865	81452	4197	0	0	0	0	0
150519	Lasallia pustulata	OTU_1	no seq	71651	4093	3361	0	0	0	0	0
150520	Lasallia pustulata	OTU_3	OTU_3	3600	2409	102056	0	0	0	0	0
150521	Lasallia pustulata	OTU_3	OTU_3	2238	1679	106183	0	0	0	0	0
150522	Lasallia pustulata	OTU_3	OTU_3	2319	0	157081	0	0	0	0	0
150523	Lasallia pustulata	OTU_3	OTU_3	1729	1430	89037	0	0	0	0	0
150524	Lasallia pustulata	OTU_3	OTU_3	1212	0	105287	0	0	0	0	0
150525	Lasallia pustulata	OTU_3	OTU_3	2291	0	109025	0	0	0	0	0
150526	Lasallia pustulata	OTU_3	OTU_3	1817	0	94563	0	0	0	0	0
150527	Lasallia pustulata	OTU_3	OTU_3	2040	0	117937	0	0	0	0	0
150528	Lasallia pustulata	OTU_3	OTU_3	2090	0	78114	0	0	0	0	0
150529	Lasallia pustulata	OTU_3	no seq	2147	0	100245	0	0	0	0	0
150530	Lasallia pustulata	OTU_3	OTU_3	1683	0	71997	0	0	0	0	0
150531	Lasallia pustulata	OTU_3	OTU_3	1341	0	6509	0	0	0	0	0
150532	Lasallia pustulata	OTU_3	OTU_3	2177	0	118467	0	0	0	0	0
150533	Lasallia pustulata	OTU_3	OTU_3	2451	1317	101134	0	0	0	0	0
150534	Lasallia pustulata	OTU_3	OTU_3	1774	0	100834	0	0	0	0	0
150535	Lasallia pustulata	no seq	no seq	25671	49754	3544	0	0	0	0	0
150536	Lasallia pustulata	no seq	no seq	2187	0	82229	0	0	0	0	0
150537	Lasallia pustulata	OTU_3	OTU_3	1879	0	80280	0	0	0	0	0
150538	Lasallia pustulata	no seq	no seq	2119	0	59329	0	0	0	0	0
150539	Lasallia pustulata	no seq	no seq	12220	51730	3222	0	0	0	0	0
